# Supplementary material for: Cadmium targeting the circadian transcription factor BMAL1 to induce osteocyte senescence contributes to osteoporosis
Source: Research Square preprint supplement (doi:10.21203/rs.3.rs-8702171/v1), 2026-02-18
Supplement: Supplementary file 1 [file 35459751c0dbe80fd82e41ac.docx]

**Cadmium targeting the circadian transcription factor BMAL1 to induce osteocyte senescence contributes to osteoporosis**

Gengsheng Yu1,2,3,#, Xiaohui Fu1,2,3,#, Dehui Zhou1,2,3, Yonggang Ma1,2,3, Hui Zou1,2,3, Ruilong Song1,2,3,

Jianchun Bian1,2,3, Zongping Liu1,2,3*, Xishuai Tong1,2,3*

1 *College of Veterinary Medicine, Yangzhou University, Yangzhou 225009, Jiangsu, China*

*2 Joint International Research Laboratory of Agriculture and Agri-Product Safety of the Ministry of Education of China, Institute of Agricultural Science and Technology Development, Yangzhou University, Yangzhou 225009, Jiangsu, China*

*3 Jiangsu Co-Innovation Center for Prevention and Control of Important Animal Infectious Diseases and Zoonoses, Yangzhou 225009, Jiangsu, China*

# These authors contributed equally to this work.

*** Corresponding authors:**

Zongping Liu, College of Veterinary Medicine, Yangzhou University. Yangzhou 225009, Jiangsu, China. Tel: +86 13605273327; E-mail: [liuzongping@yzu.edu.cn](mailto:liuzongping@yzu.edu.cn).

Xishuai Tong, College of Veterinary Medicine, Yangzhou University. Yangzhou 225009, Jiangsu, China. Tel: +86 18252719601; E-mail: xstong@yzu.edu.cn

**Conflict of interest:** The authors declare that no conflict of interest exists.

**Table of contents:**

Supplementary Figures 1 to 7: Pages 2-9

Supplementary Tables 1 to 5: Pages 10-13


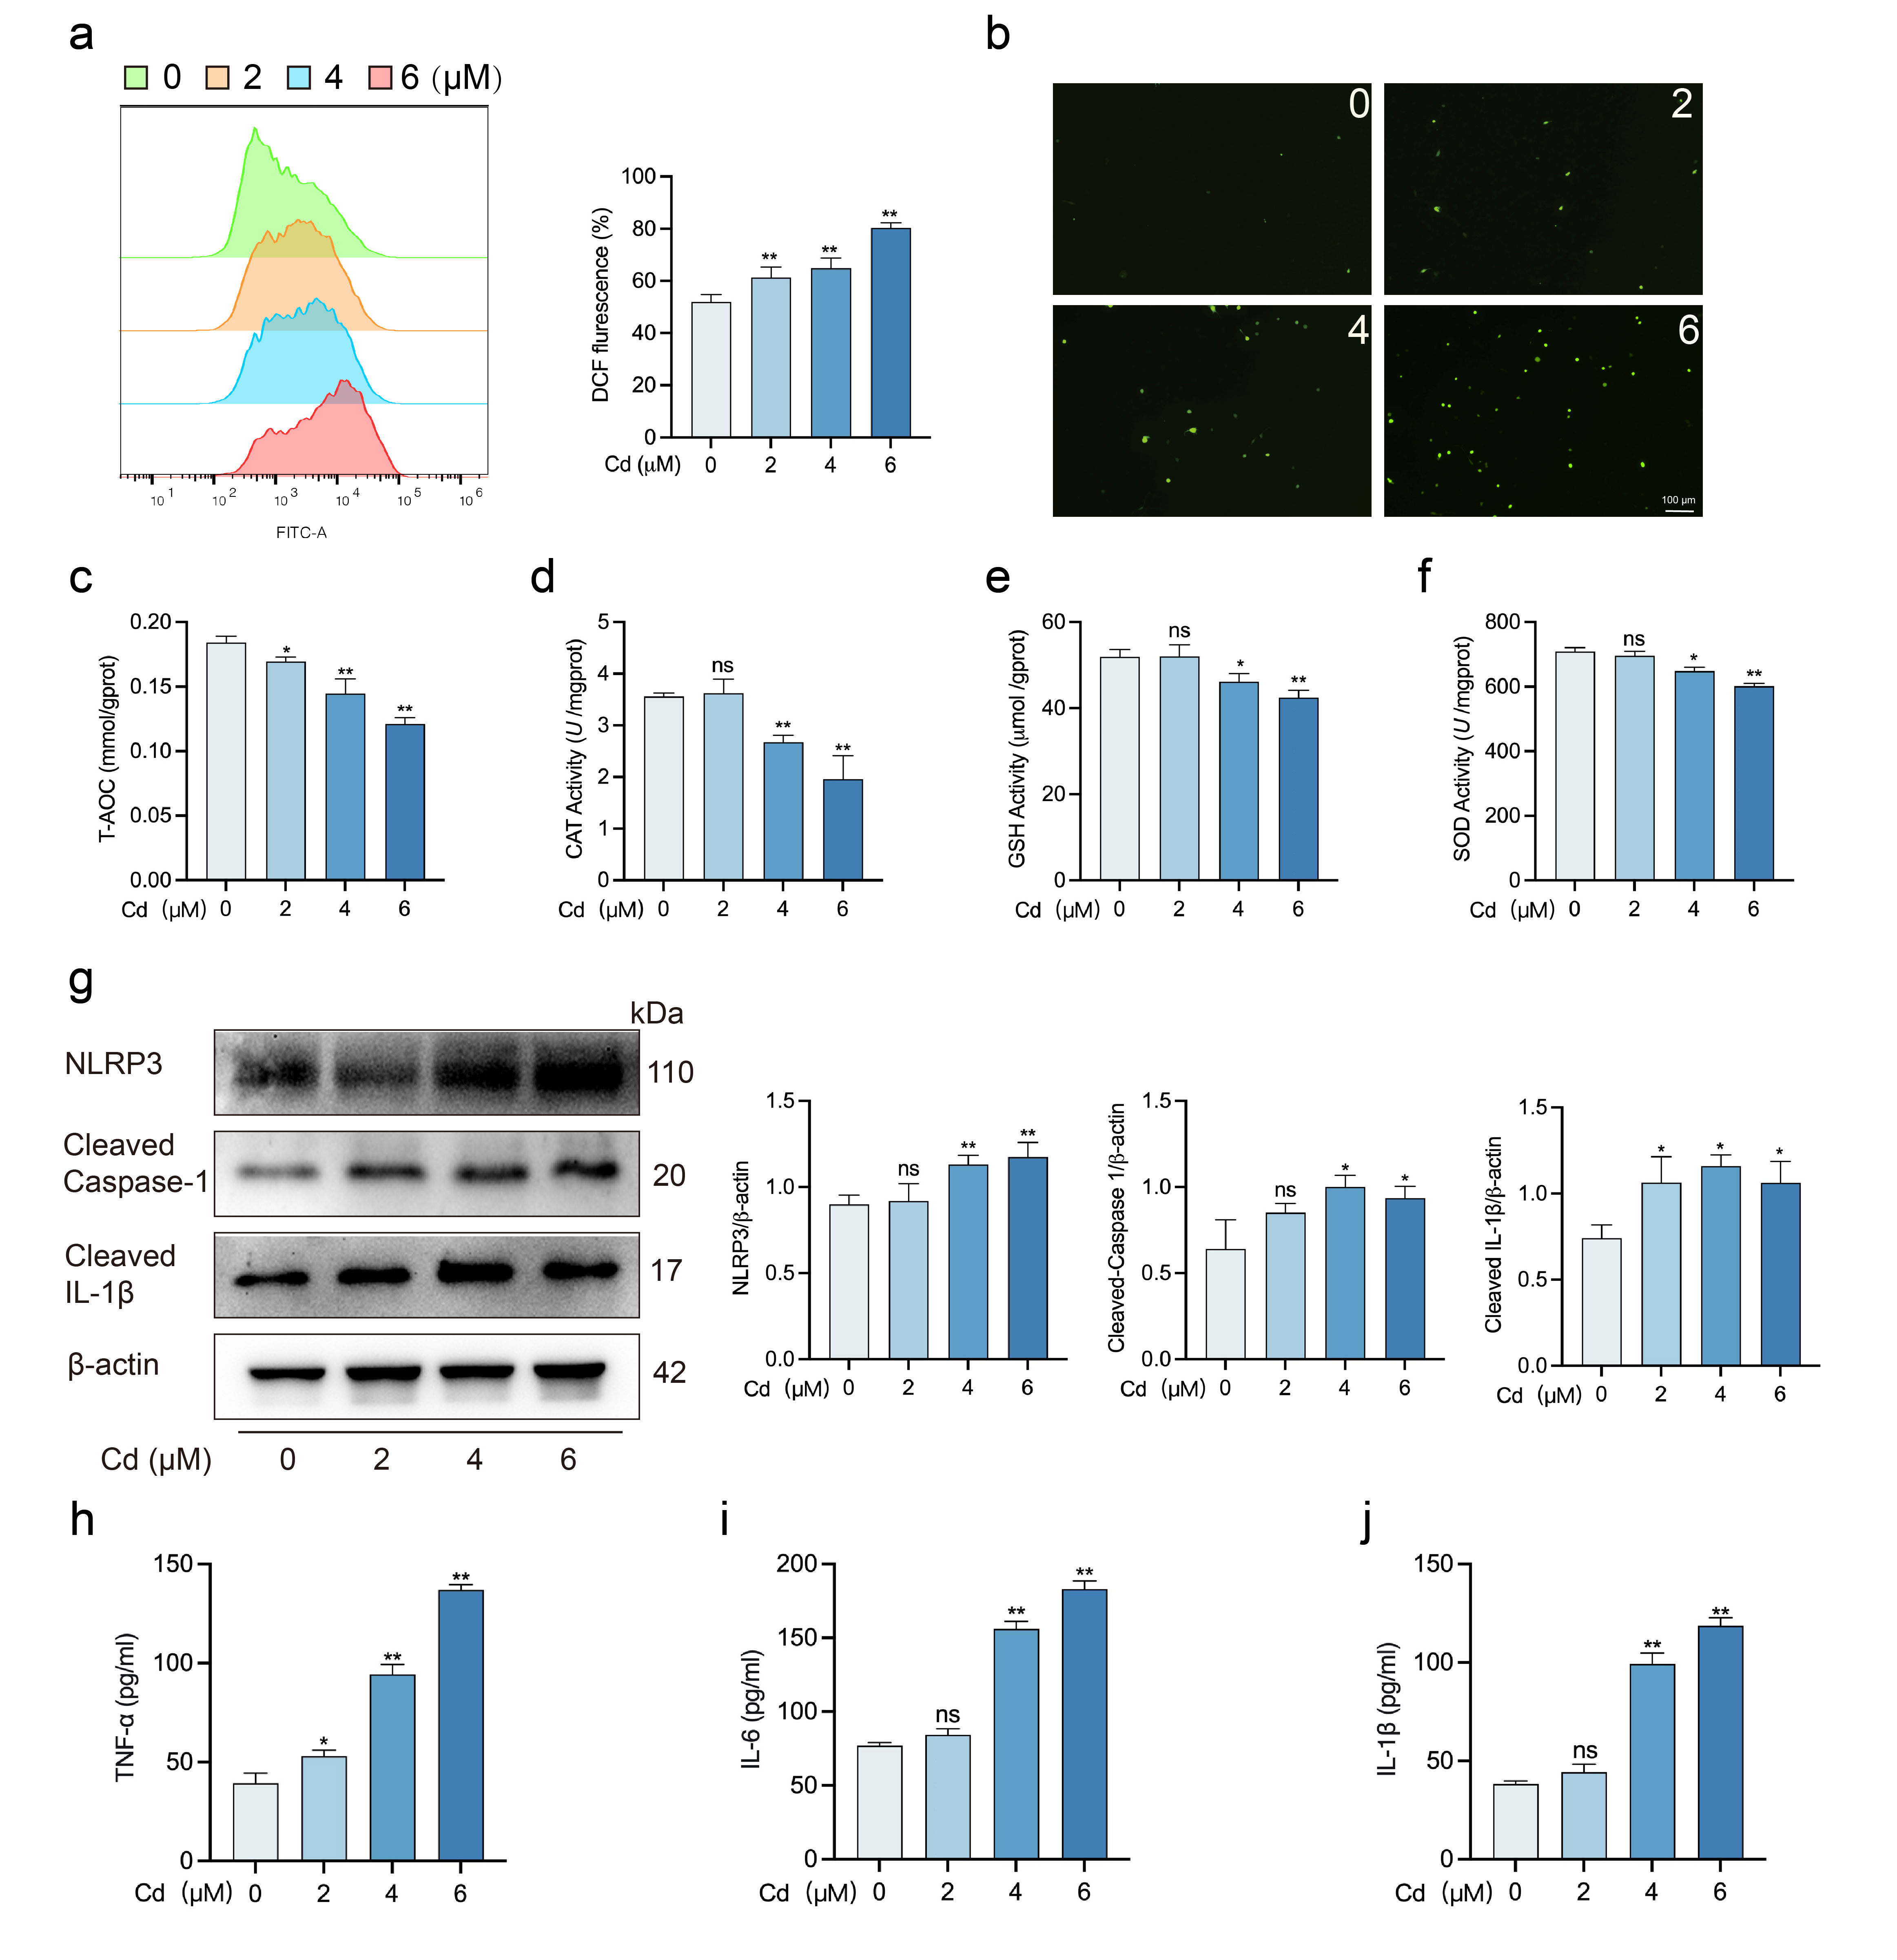


**Fig. S1 Cadmium exposure induces oxidative stress and inflammation in osteocytes.** MLO-Y4 cells were exposed to 0, 2, 4, and 6 μM Cd for 24 hours. **a** Flow cytometric analysis of ROS levels in MLO-Y4 cells (n = 3). **b** Representative images of ROS fluorescence intensity observed under a fluorescence microscope. **c-f** Measurement of total antioxidant capacity (T-AOC), catalase (CAT), glutathione (GSH), and superoxide dismutase (SOD) activity using biochemical assay kits (n = 3). **g** Western blot analysis and quantification of NLRP3, cleaved caspase-1, and IL-1β (n = 3). **h-j** Quantification of TNF-α, IL-6, and IL-1β levels in cells using ELISA kits (n = 3). Data are presented as mean ± SD; **p* < 0.05, ***p* < 0.01 vs. 0 μM Cd; ns, not significant.

**
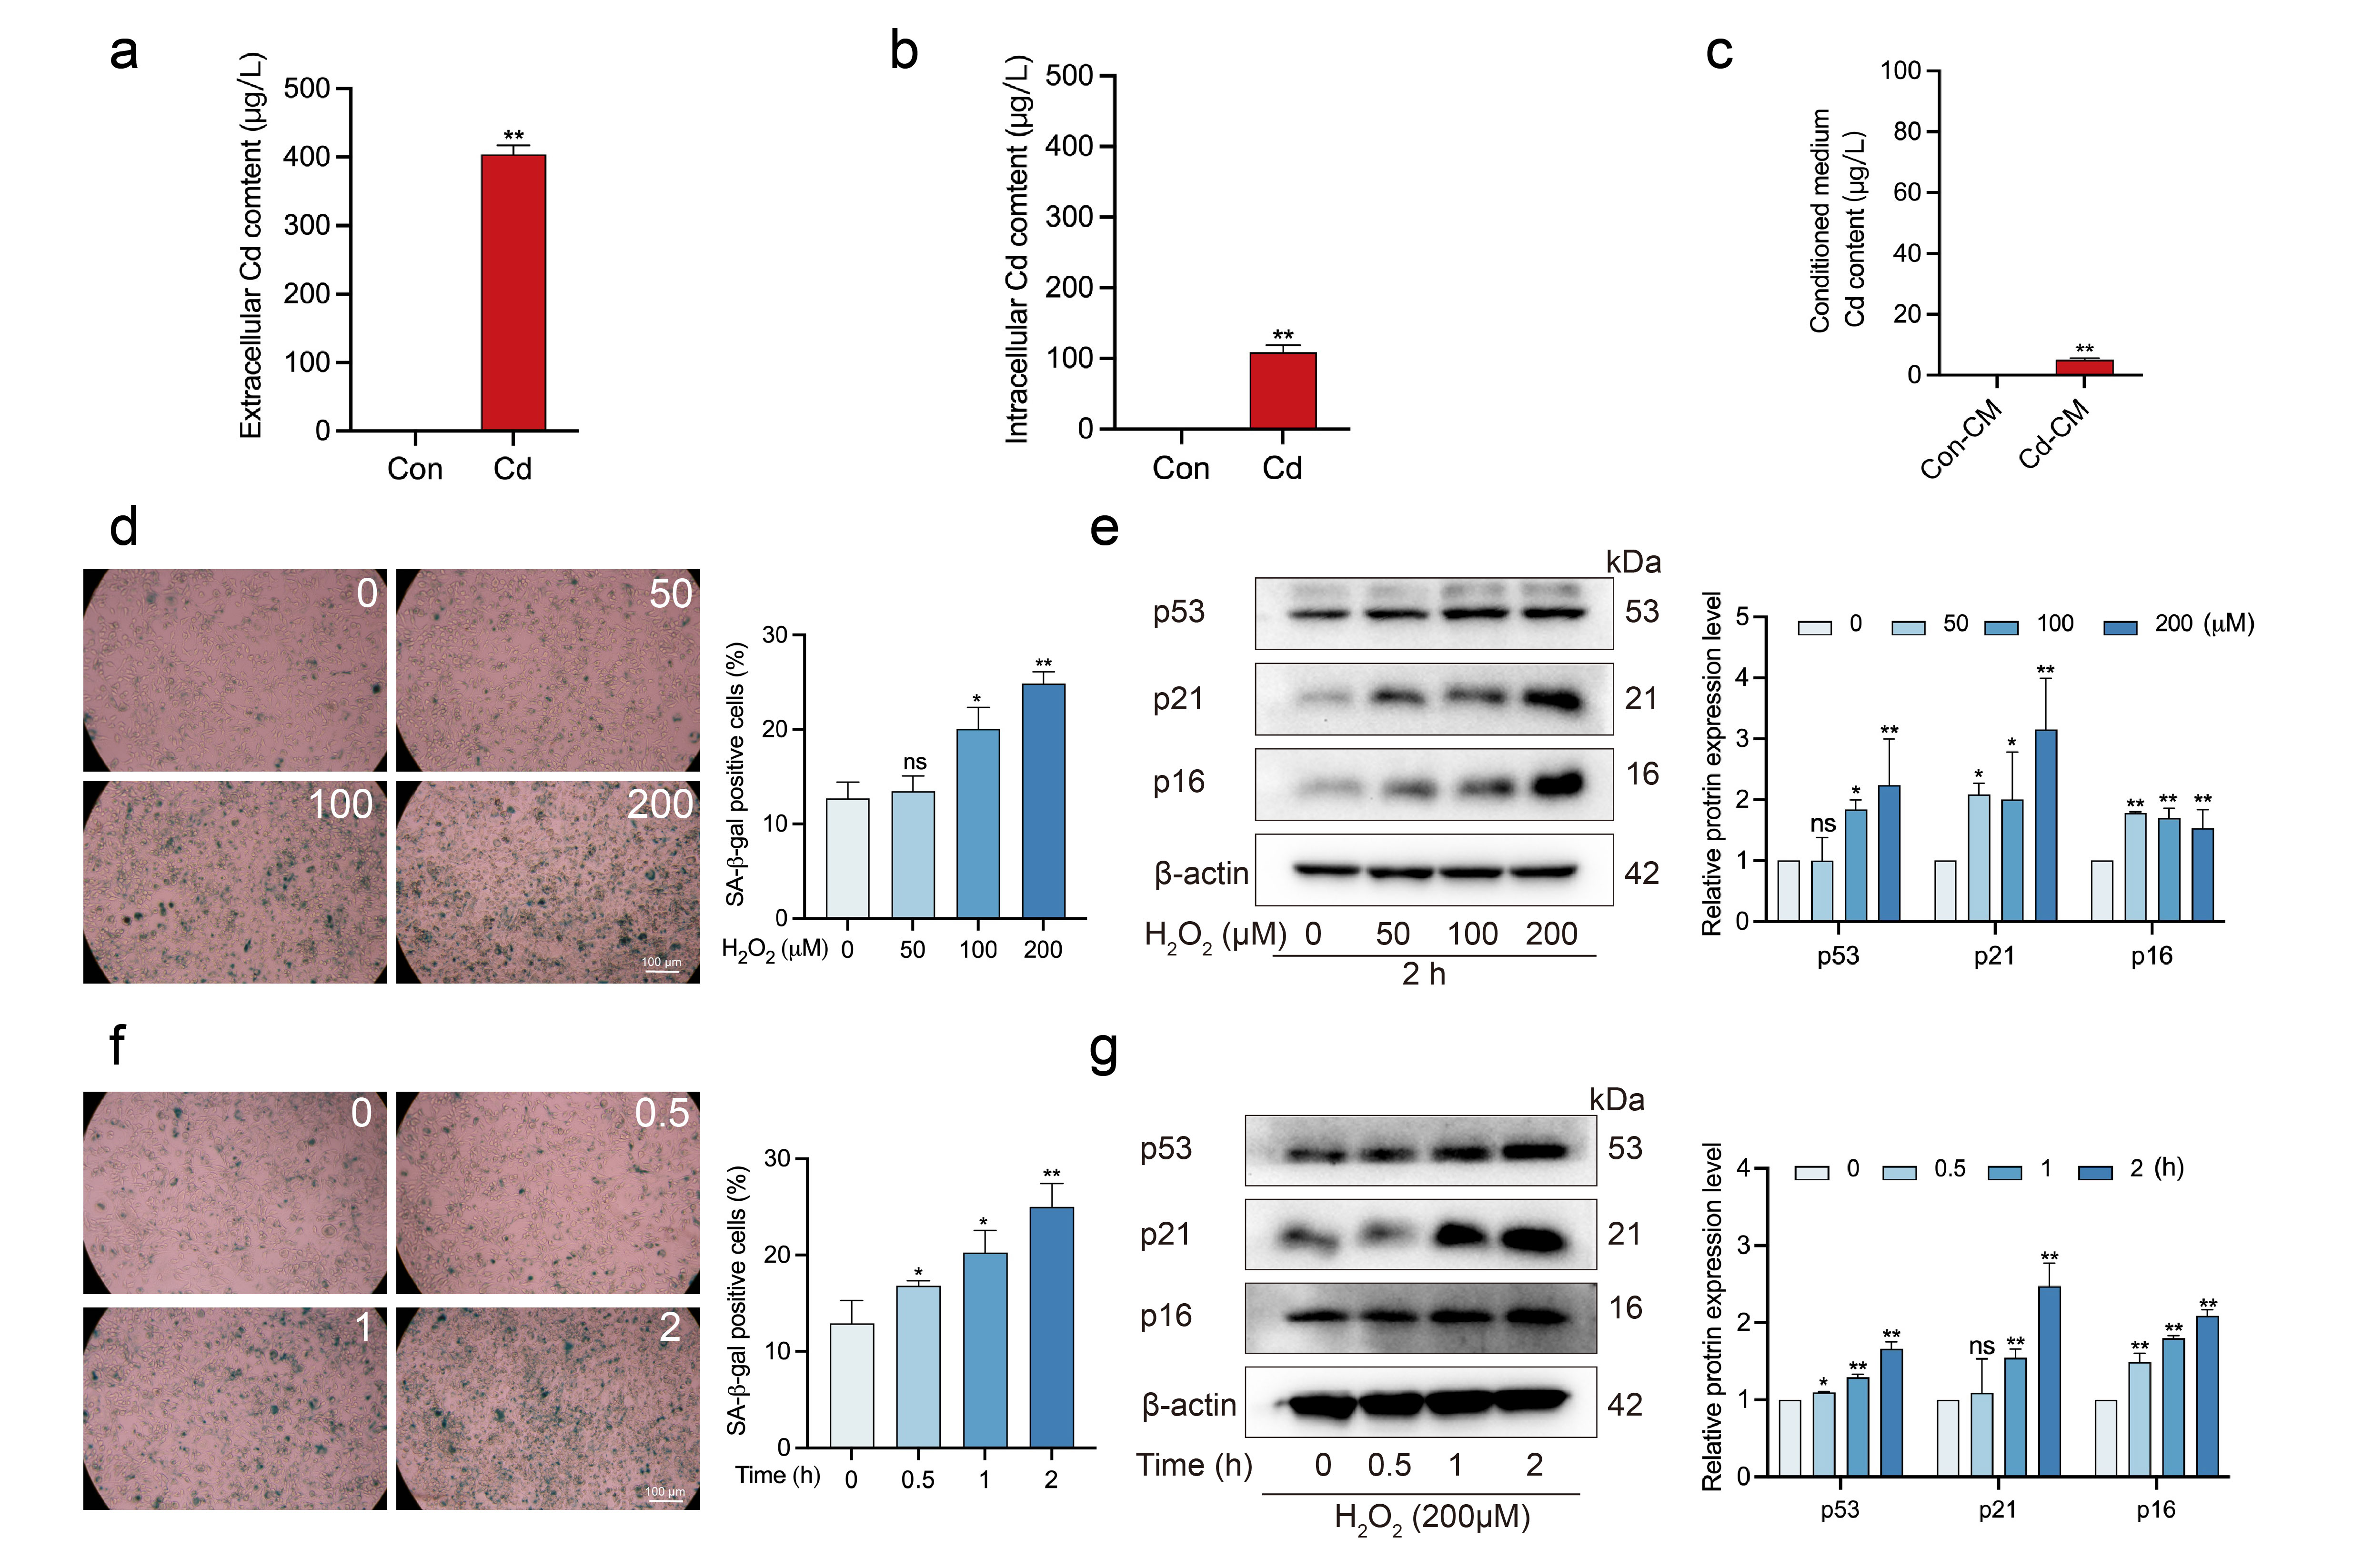
**

**Fig. S2 Establishment of senescent osteocyte-conditioned medium.** MLO-Y4 cells were exposed to 4 μM Cd for 24 hours.**a** Quantification of extracellular Cd levels (n = 3). **b** Intracellular Cd content in Con and Cd-treated MLO-Y4 cells (n = 3). **c** Cd levels in the CM from control and Cd-treated groups (n = 3). MLO-Y4 cells were treated with 0, 50, 100, and 200 μM hydrogen peroxide (H₂O₂) for 2 hours, followed by replacement with fresh medium and further incubation for 48 hours. **d** SA-β-gal staining and quantification of senescent MLO-Y4 cells (n = 3). **e** Western blot analysis and quantification of p53, p21, and p16 in MLO-Y4 cells (n = 3). MLO-Y4 cells were exposed to 200 μM H₂O₂ for different durations, followed by medium replacement and continued culture for 48 hours. **f** SA-β-gal staining and quantification of senescent MLO-Y4 cells (n = 3). **g** Western blot analysis and quantification of p53, p21, and p16 in MLO-Y4 cells (n = 3). Data are presented as mean ± SD; **p* < 0.05, ***p* < 0.01 vs. Con; ns, not significant.


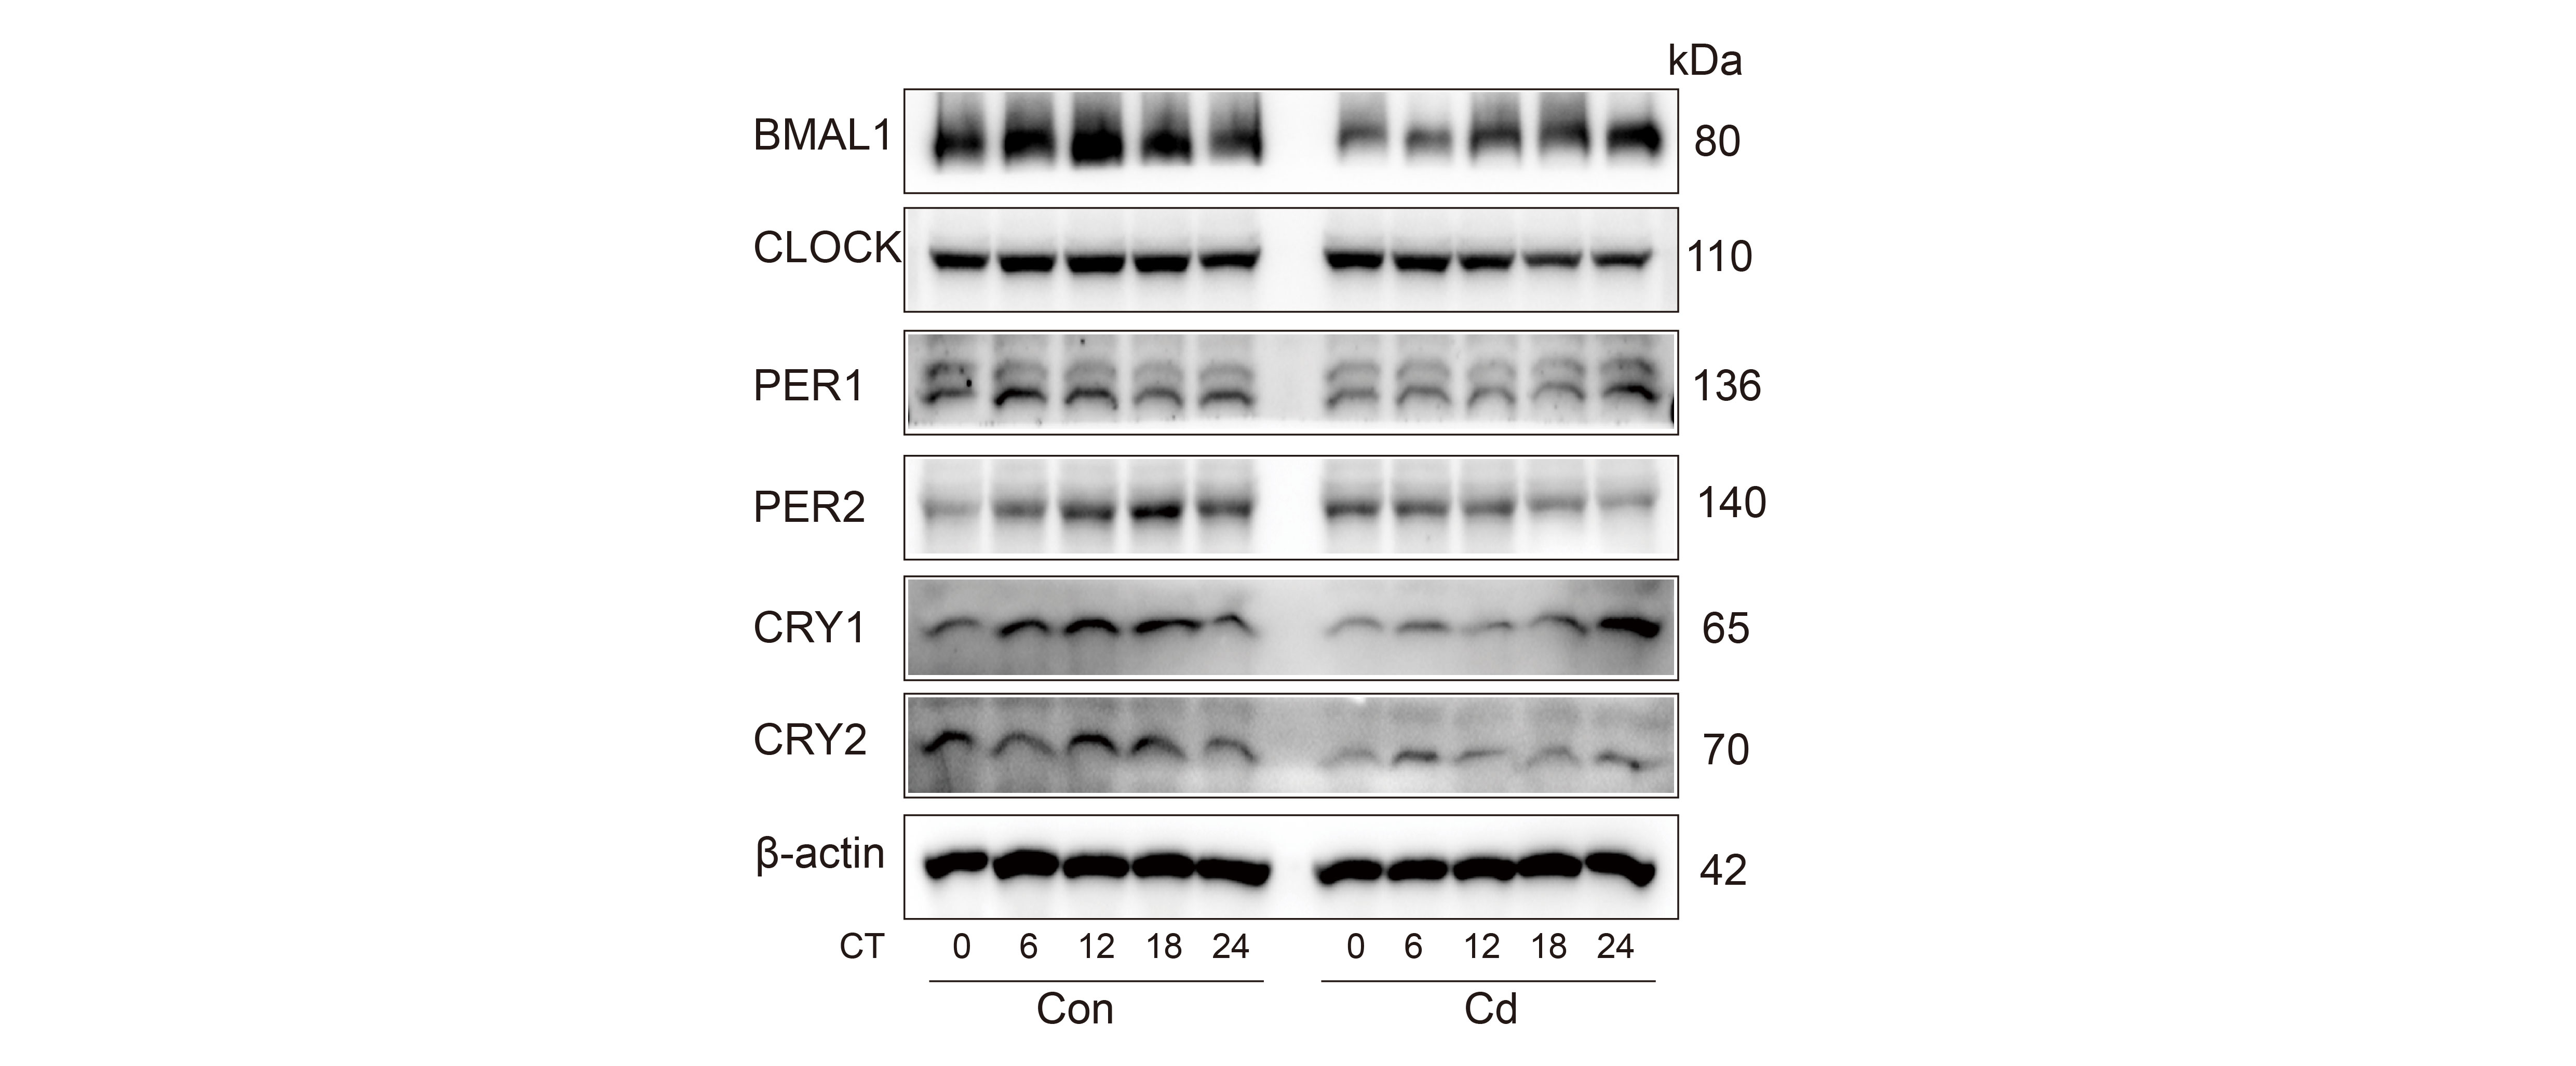


**Fig. S3 Cd exposure alters the temporal patterns of core circadian clock proteins expression in cells.** MLO-Y4 cells were exposed to 4 μM Cd for 24 hours. Protein levels of BMAL1, CLOCK, PER1, PER2, CRY1, and CRY2 were examined by Western blotting. β-actin was used as a loading control.


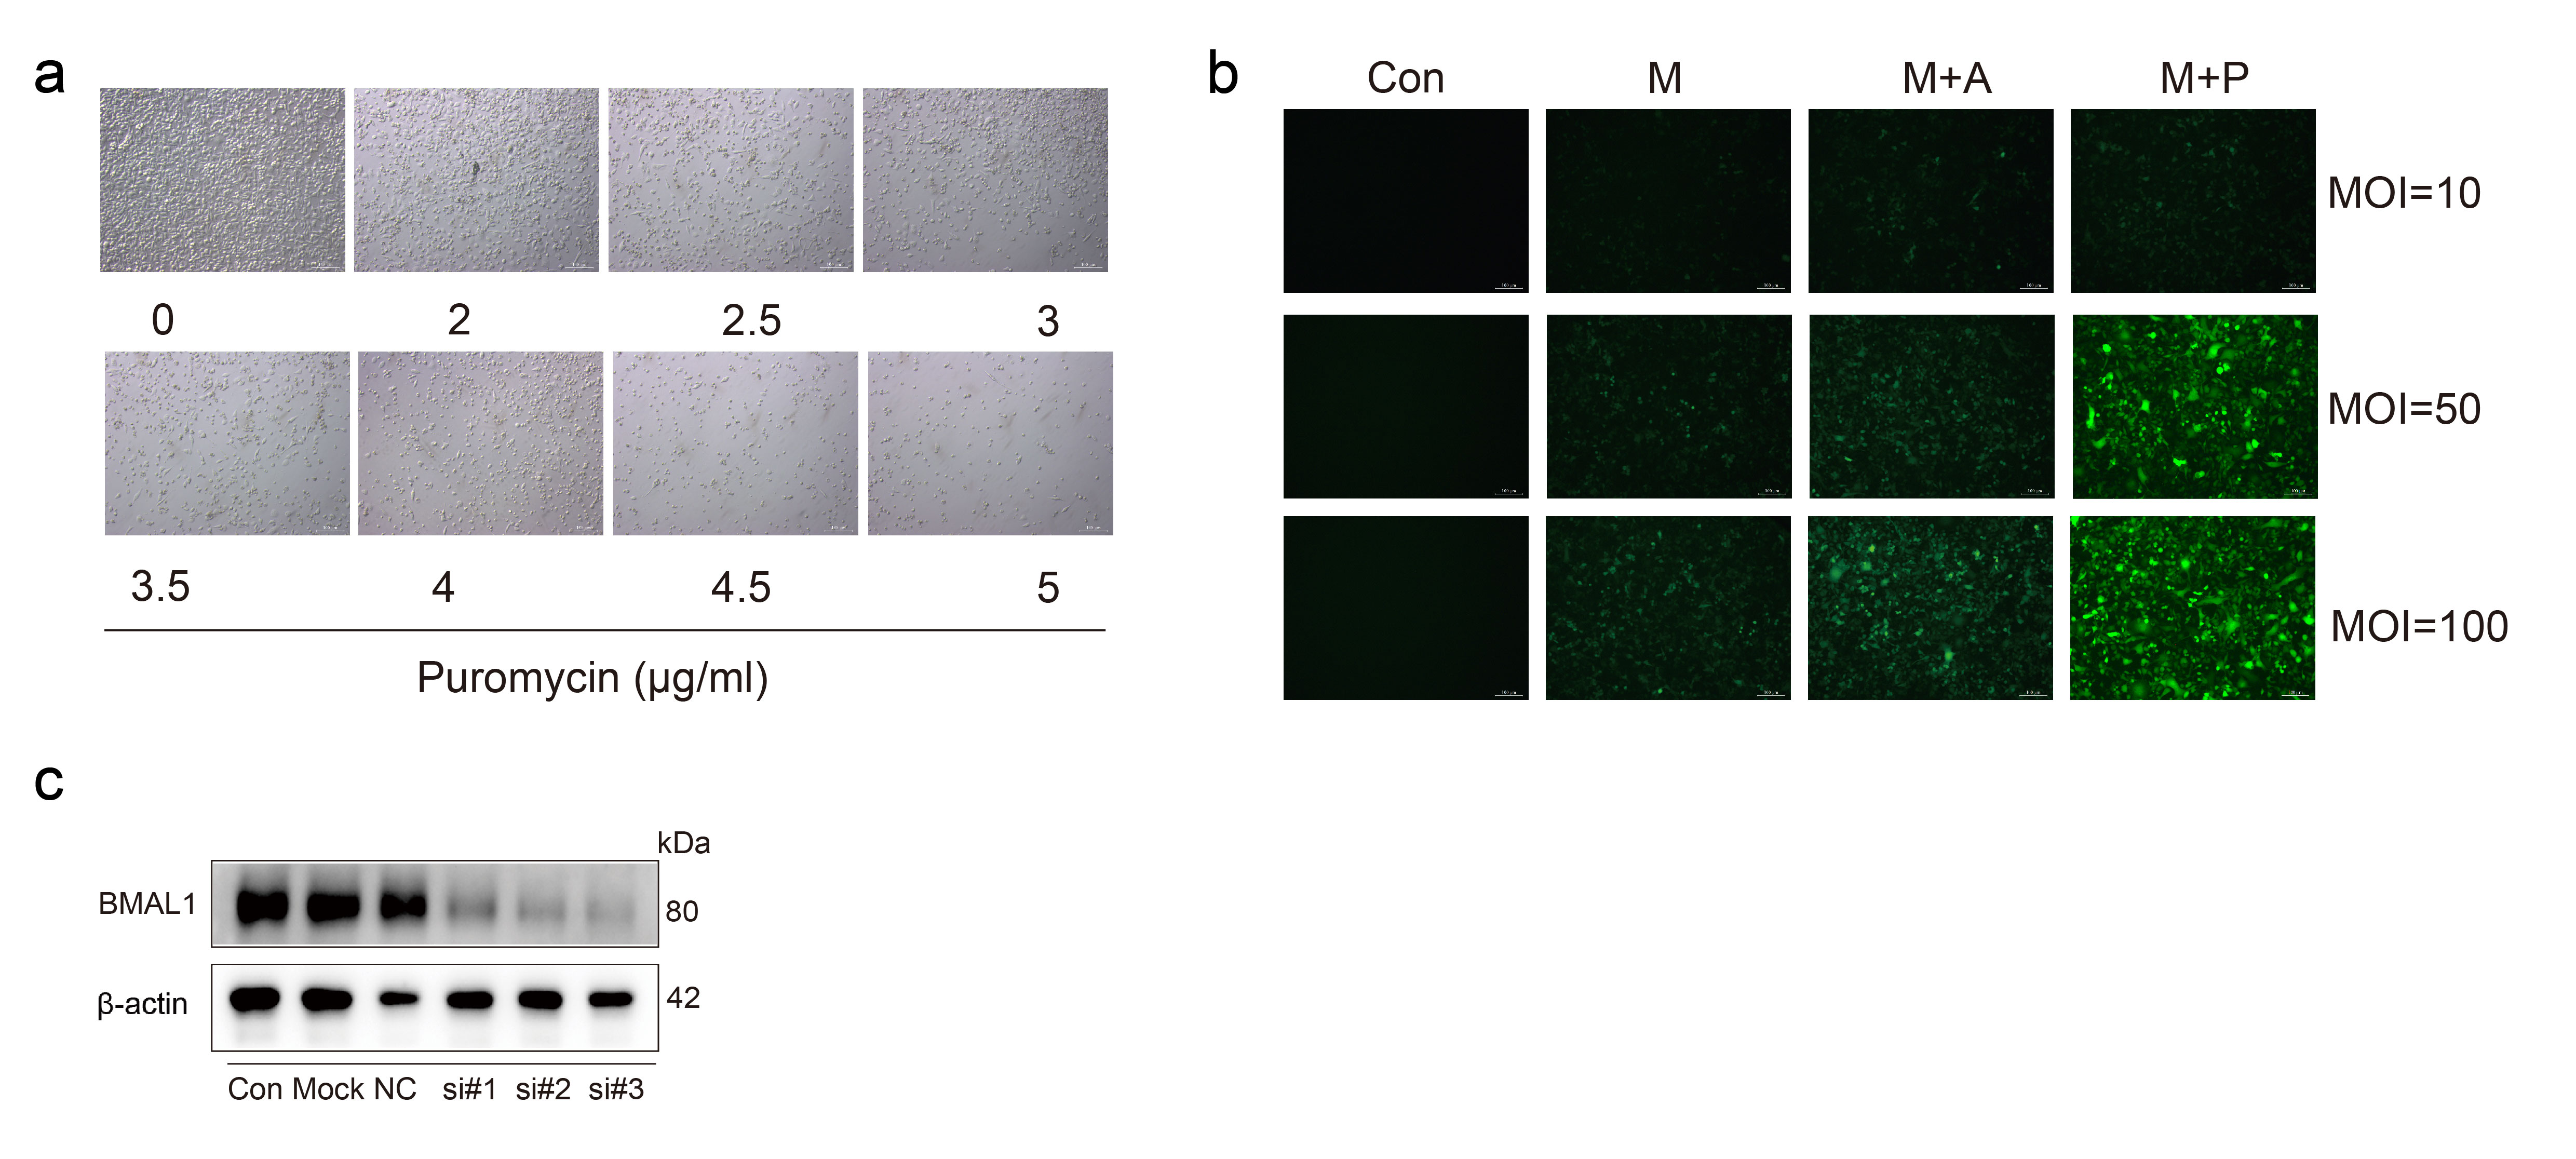


**Fig. S4 Establishment of** **Bmal1-overexpression and Bmal1-silenced cell lines.** **a** Puromycin kill curve. Cells were exposed to 0-5 μg/mL puromycin for 48 hours to determine the optimal dose for selection of stable transduced cells. A final concentration of 4 μg/mL puromycin was chosen for subsequent experiments. **b** Optimization of lentiviral transduction. Cells were infected with lentivirus for 12 hours, followed by replacement with complete medium and continued culture for 48 hours. Then, 4 μg/mL puromycin was added for 48 hours to select transduced cells. Transduction efficiency was evaluated by fluorescence microscopy. Con: untreated control; M: virus only; M+A: virus with HitransG A enhancer; M+P: virus with HitransG P enhancer. The condition M+P at MOI = 50 was selected for this study. **c** Screening siRNAs for Bmal1 silencing. Cells were transfected with 50 nM of three candidate siRNAs targeting Bmal1 (si#1–si#3) for 24 hours, BMAL1 protein expression was evaluated by Western blot, negative control (NC), untreated (Con) and mock-transfected (Mock). si-Bmal1#3 was selected for further experiments based on silencing efficiency.


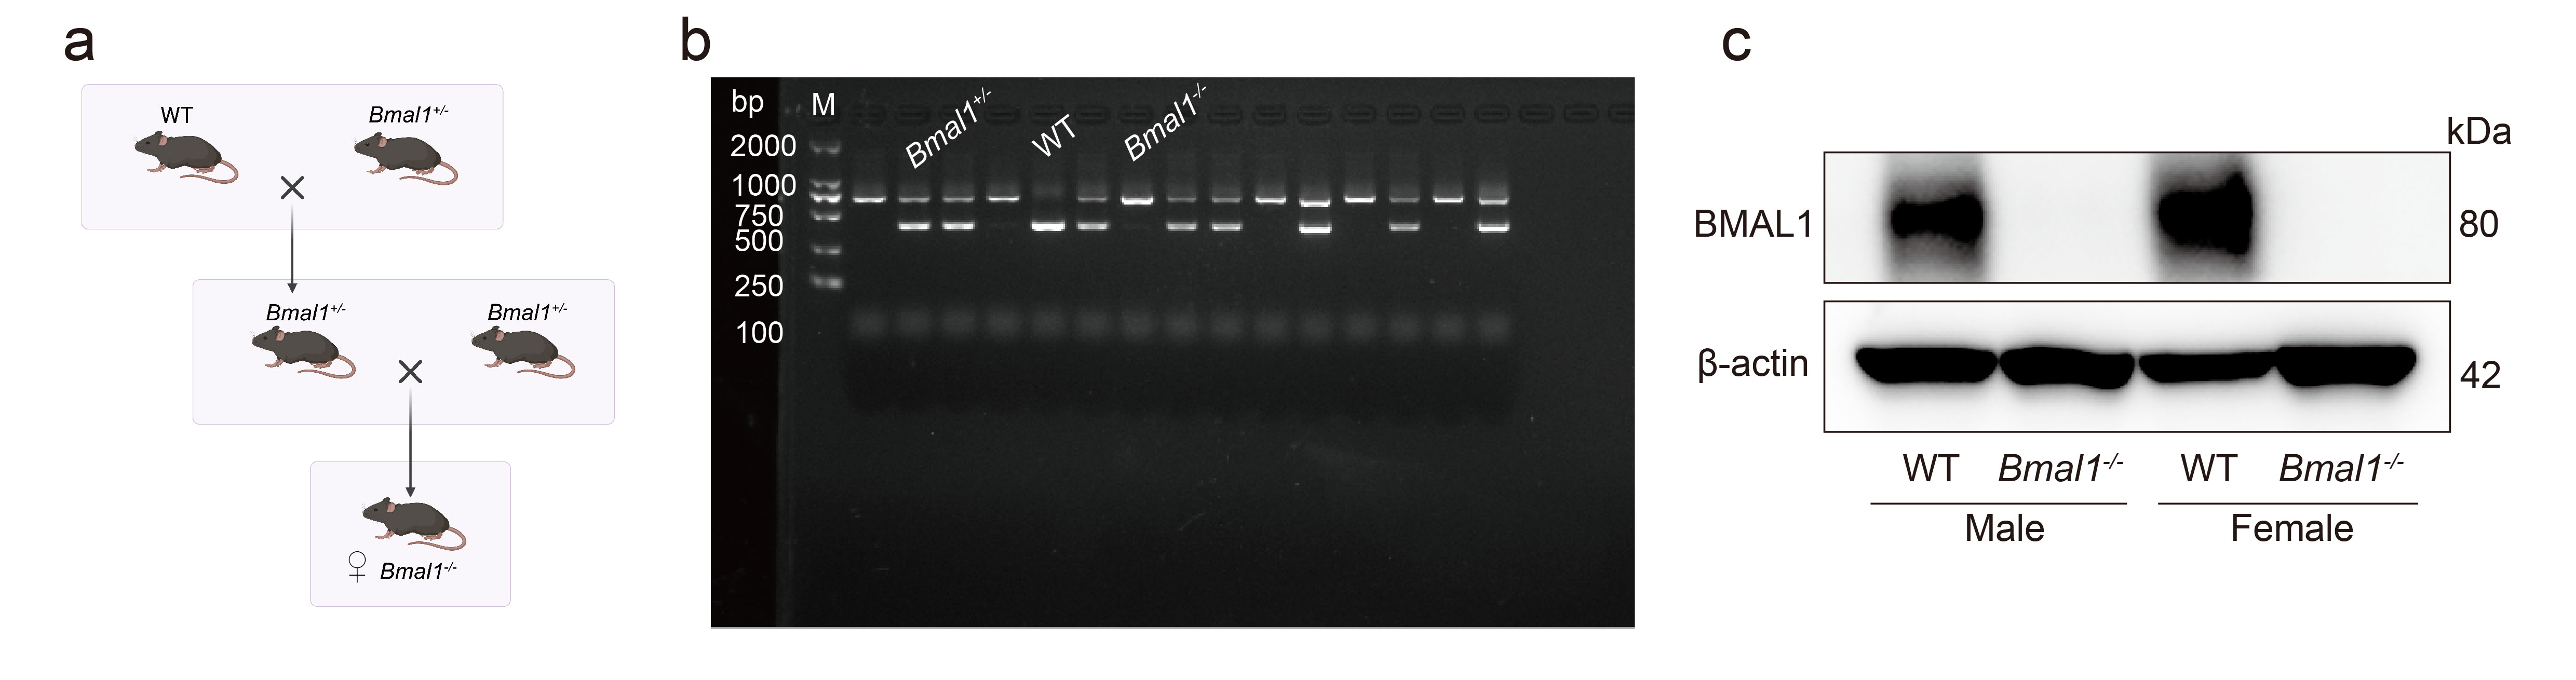


**Fig. S5 Generation and validation of *Bmal1–/–* mice.** **a** Breeding strategy for the generation of Bmal1 knockout (*Bmal1–/–*) mice. **b** Genotyping by PCR of tail genomic DNA: M: molecular weight marker; WT: wild–type; *Bmal1+/–*: heterozygous; *Bmal1–/–*: homozygous knockout. **c** Western blot analysis confirming the absence of BMAL1 protein expression in bone tissue from both male and female *Bmal1–/–* mice.


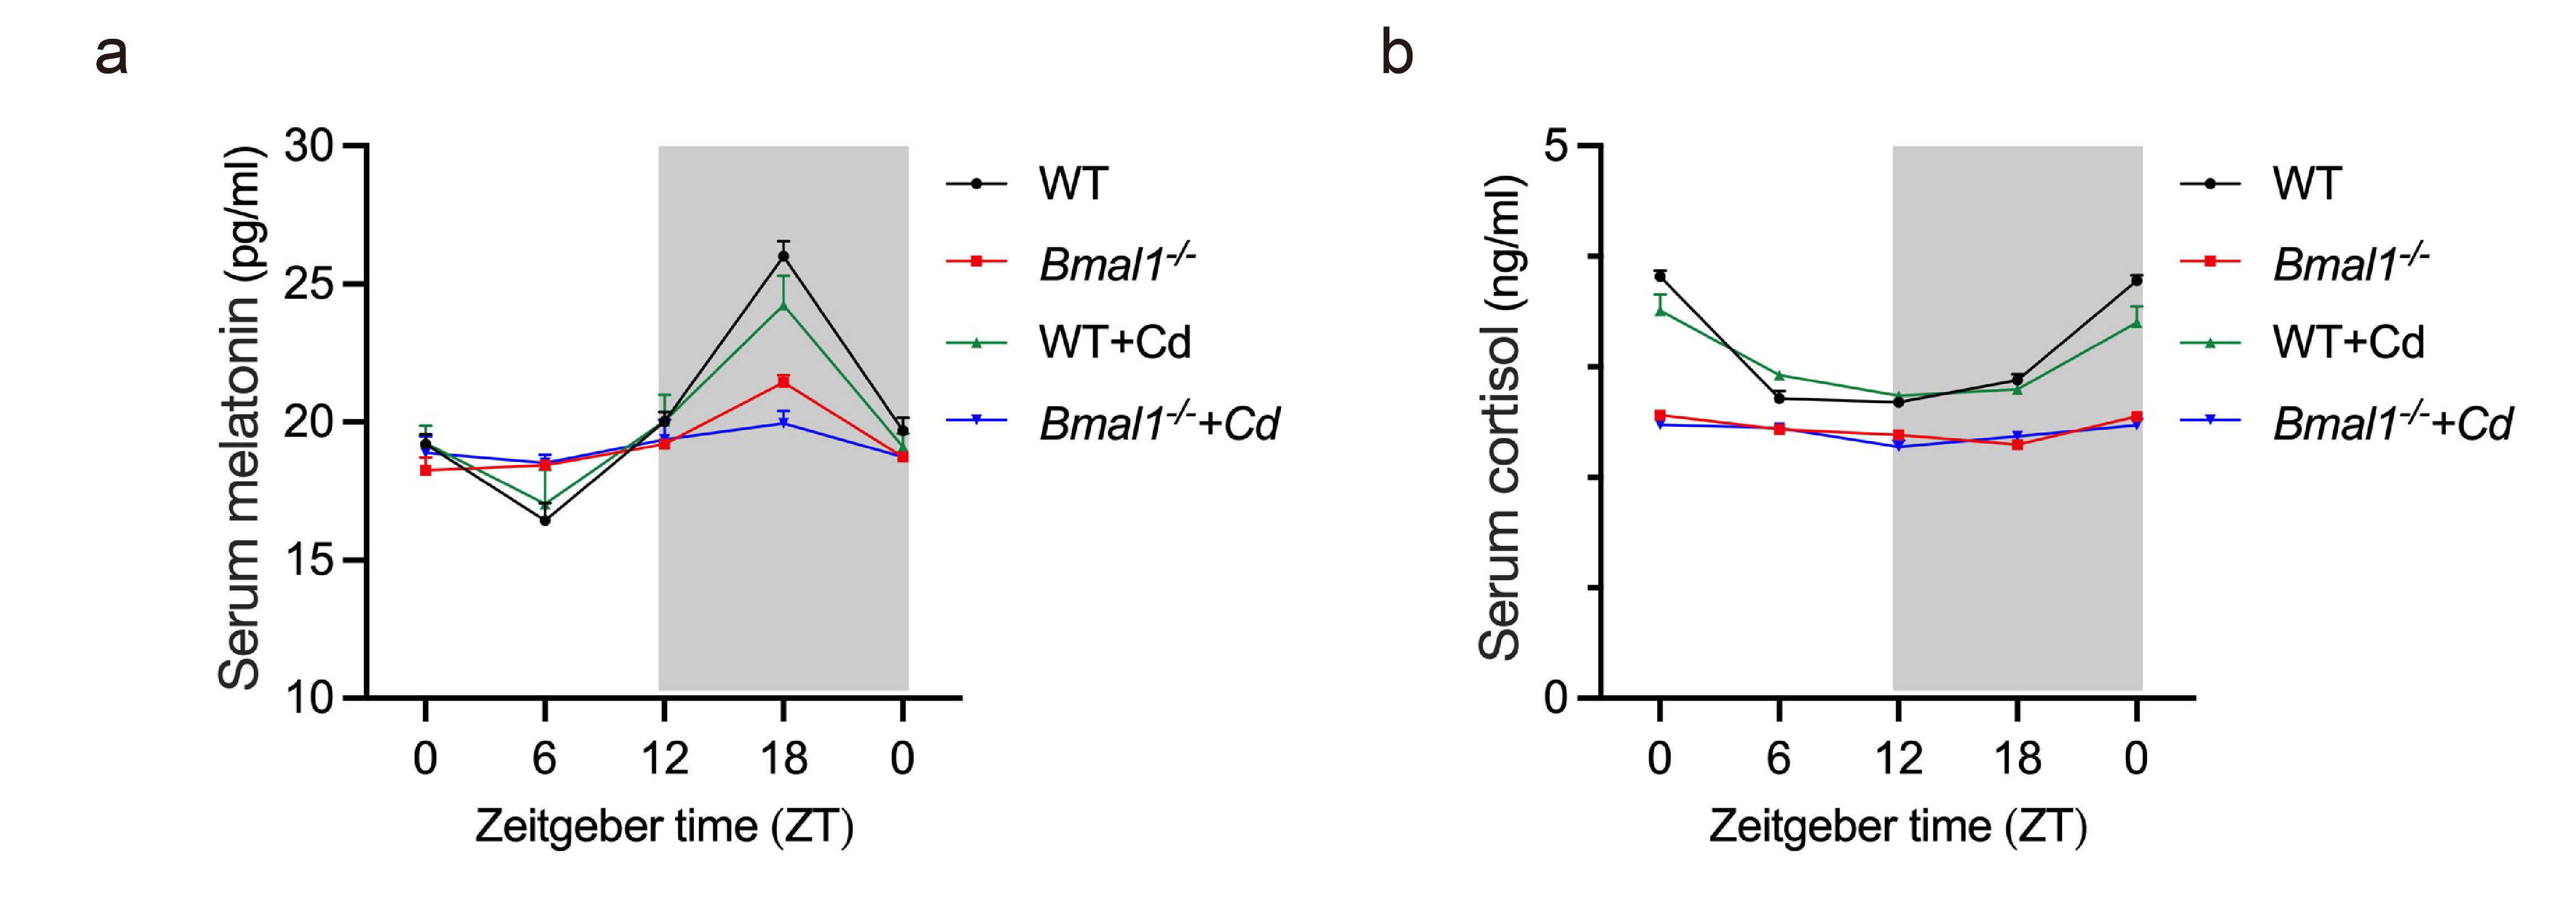


**Fig. S6 Cd exposure exacerbates disruption of circadian rhythmicity in *Bmal1–/–* mice.** **a, b** Serum melatonin concentrations and cortisol concentrations were measured using ELISA kits at indicated Zeitgeber times (ZT) (n = 3). Data are presented as mean ± SEM. The shaded area indicates the dark phase.

**
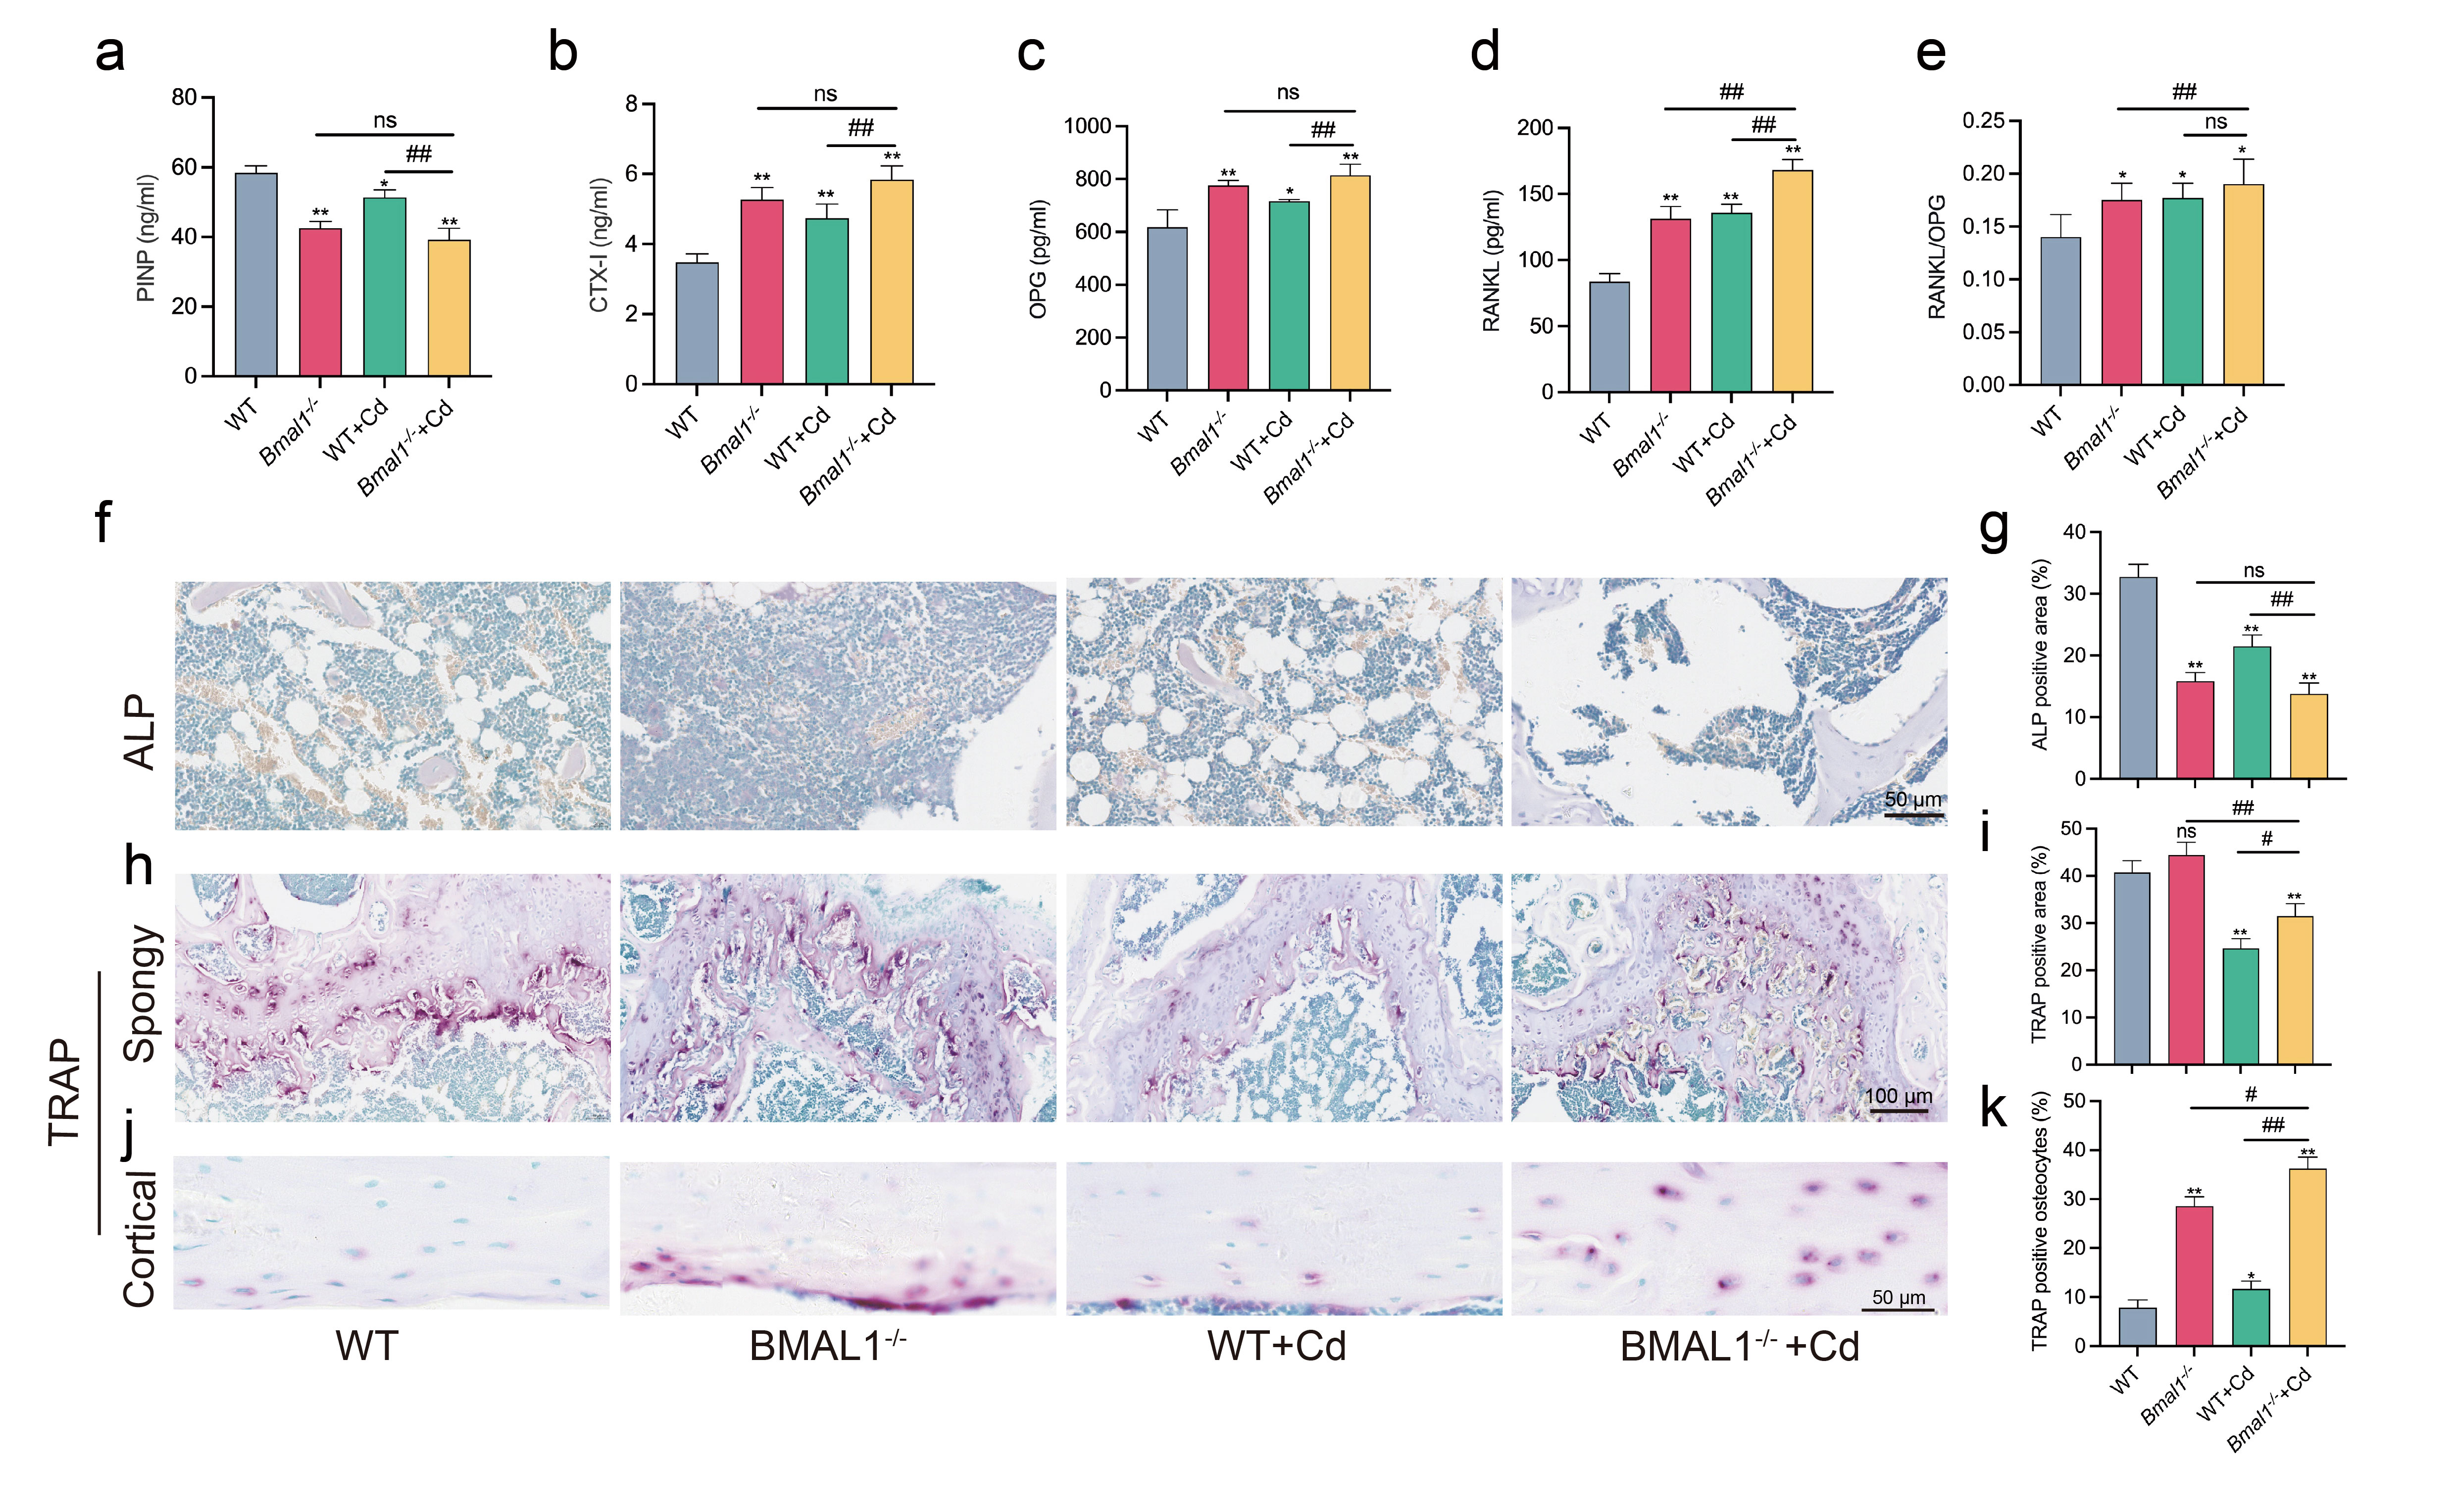
**

**Fig. S7 Bmal1 deficiency enhances osteocyte-mediated bone resorption and aggravates bone metabolic imbalance.** Bone turnover marker levels in serum were measured using ELISA kits: **a** procollagen type I N-terminal propeptide (PINP), **b** C-terminal telopeptide of type I collagen (CTX-I), **c** osteoprotegerin (OPG), **d** receptor activator of nuclear factor κB ligand (RANKL), **e** RANKL/OPG ratio (n = 3). **f, g** Representative ALP staining of bone sections and quantification of ALP-positive area (n = 3). **h, i** Representative TRAP staining in spongy bone and quantification of TRAP-positive area (n = 3). **j, k** Representative TRAP staining in cortical bone and quantification of TRAP-positive osteocytes (n = 3). Data are presented as mean ± SD. **P* < 0.05, ***P* < 0.01 vs. WT; *#P* < 0.05, *##P* < 0.01 vs. WT+Cd; ns, not significant.

**Table S1. The chemicals and reagents information used in this study**

| **Antibody name** | **Catalog number** | **Company name** |
| --- | --- | --- |
| Cadmium dichloride | 202908 | Sigma-Aldrich |
| Dasatinib | HY-10181 | MedChemExpress |
| Quercetin | HY-18085 | MedChemExpress |
| Melatonin | HY-B0075 | MedChemExpress |
| SDA-PAGE Loading Buffer | WB2001 | NCM Biotech Co., Ltd. |
| RIPA buffer | WB3100 | NCM Biotech Co., Ltd. |
| Phosphatase inhibitor | P003 | NCM Biotech Co., Ltd. |
| Enhanced chemiluminescence | P10300 | NCM Biotech Co., Ltd. |
| TRIzol Reagent | 15596018CN | Thermo Fisher Scientific Inc |
| BCA Protein Quantification Kit | 20201ES90 | Yeasen Biotech Co., Ltd. |
| Transfection Reagent | 101000046 | Polyplus |
| GSH assay kit | A005-1-2 | Nanjing Jiancheng Bioengineering Institute |
| CAT assay kit | A007-1-1 | Nanjing Jiancheng Bioengineering Institute |
| T-AOC assay kit | A015-2-1 | Nanjing Jiancheng Bioengineering Institute |
| SOD assay kit | A001-2-2 | Nanjing Jiancheng Bioengineering Institute |
| Mouse IL-1β ELISA KIT | ml106733 | Enzyme-inked Biotechnology Co., Ltd. |
| Mouse IL-6 ELISA KIT | ml063159 | Enzyme-inked Biotechnology Co., Ltd. |
| Genotyping assay kit | D7283S | Beyotime Biotechnology Inc. |
| ROS assay kit | S0033M | Beyotime Biotechnology Inc. |
| Cell cycle assay kit | C1052 | Beyotime Biotechnology Inc. |
| Apoptosis detection kit | C1062M | Beyotime Biotechnology Inc. |
| Alizarin Red stain kit | C0148S | Beyotime Biotechnology Inc. |
| SA-β-Gal stain kit | G1580 | Solarbio Science Technology Co., Ltd. |
| Alcian Blue stain kit | G1565 | Solarbio Science Technology Co., Ltd. |
| ALP stain kit | G1481 | Solarbio Science Technology Co., Ltd. |
| Oil Red O stain kit | G1261 | Solarbio Science Technology Co., Ltd. |
| TRAP stain kit | G1492 | Solarbio Science Technology Co., Ltd. |

**Table S2. Antibody information for western blot**

**Primary antibodies**

| **Antibody name** | **Catalog number** | **Company name** | **Concentration** |
| --- | --- | --- | --- |
| BMAL1 | 14020S | Cell Signaling Technology | 1:1000 |
| CLOCK | 5157S | Cell Signaling Technology | 1:1000 |
| p53 | 2524T | Cell Signaling Technology | 1:1000 |
| γ-H2AX | 9718T | Cell Signaling Technology | 1:1000 |
| Cyclin B1 | 4138T | Cell Signaling Technology | 1:1000 |
| Cyclin E1 | 20808T | Cell Signaling Technology | 1:1000 |
| CDK2 | 2546T | Cell Signaling Technology | 1:1000 |
| CDK4 | 93597T | Cell Signaling Technology | 1:1000 |
| Cleaved Caspase-1 | 89332S | Cell Signaling Technology | 1:1000 |
| Cleaved IL-1β | 63124S | Cell Signaling Technology | 1:1000 |
| SOST | 21933-1-AP | Proteintech | 1:1000 |
| NLRP3 | 30109-1-AP | Proteintech | 1:1000 |
| β-actin | 66009-1-Ig | Proteintech | 1:10000 |
| DCSTAMP | A14630 | ABclonal | 1:1000 |
| PER1 | A8449 | ABclonal | 1:1000 |
| PER2 | A13168 | ABclonal | 1:1000 |
| CRY1 | A13662 | ABclonal | 1:1000 |
| CRY2 | A6891 | ABclonal | 1:1000 |
| p21 | sc-471 | Santa Cruz | 1:500 |
| p16 | sc-1661 | Santa Cruz | 1:500 |

**Secondary antibodies**

| **Antibody name** | **Catalog number** | **Company name** | **Concentration** |
| --- | --- | --- | --- |
| Goat Anti-Mouse IgG | 115-005-003 | Jackson ImmunoResearch | 1:10000 |
| Goat Anti-Rabbit IgG | 111-005-003 | Jackson ImmunoResearch | 1:10000 |
| Goat Anti-Syrian Hamster IgG | 107-005-142 | Jackson ImmunoResearch | 1:10000 |

**Table S3. Antibody information for IHC and IF**

**Antibodies for IHC**

| **Antibody name** | **Catalog number** | **Company name** | **Concentration** |
| --- | --- | --- | --- |
| SOST | 21933-1-AP | Proteintech | 1:100 |
| p16 | sc-1661 | Santa Cruz Biotechnology, Inc. | 1:50 |

**Antibodies for IF**

**Primary antibodies**

| **Antibody name** | **Catalog number** | **Company name** | **Concentration** |
| --- | --- | --- | --- |
| p16 | sc-1661 | Santa Cruz Biotechnology, Inc. | 1:100 |
| γ-H2AX | 9718T | Cell Signaling Technology | 1:100 |

**Secondary antibody**

| **Antibody name** | **Catalog number** | **Company name** | **Concentration** |
| --- | --- | --- | --- |
| AF488-labeled Goat Anti-Rabbit IgG (H+L) | A0423 | Beyotime Biotechnology Inc. | 1:500 |
| Cy3-labeled Goat Anti-Mouse IgG (H+L) | A0521 | Beyotime Biotechnology Inc. | 1:500 |

**Table S4**. **siRNA target sequence in this study**

| siRNA | siRNA target sequence |
| --- | --- |
| Si-Bmal1#1 | 5′-GCAAACTACAAGCCAACAT-3′ |
| Si-Bmal1#2 | 5′-GCTCTTTCTTCTGTAGAAT-3′ |
| Si-Bmal1#3 | 5′- CCAAGGAAGTTGAATACAT-3′ |

**Table S5**. **The primer sequences for genotyping**

| Name | Primer |
| --- | --- |
| *Bmal1* Forward | CCACCAAGCCCAGCAACTCA |
| *Bmal1* WT | ATTCGGCCCCCTATCTTCTGC |
| *Bmal1* KO | TCGCCTTCTATCGCCTTCTTGACG |
